# Supplementary material for: Influence of Nordic walking with poles with an integrated resistance shock absorber on carbohydrate and lipid metabolic indices and white blood cell subpopulations in postmenopausal women
Source: PeerJ. 2022 Jun 30;10:e13643. doi: 10.7717/peerj.13643 (PMC9250761; doi:10.7717/peerj.13643)
Supplement: Data S1 [file peerj-10-13643-s001.xlsx]

## Sheet: Arkusz1
L.p.	NW or RSA poles	Age [years]	Height [cm]	Body mass [kg]_1	BMI [kg/m2]_1	BMI (Babiarczyk et al. : 0 -normal, 1- above normal)	Total fat [%]_1	Total fat [g]_1	WBC _1 [109/l]	LYM _1 [109/l]	MON _1 [109/l]	GRA _1 [109/l]	LYM _1 [%]	MON _1 [%]	GRA_1 [%]	25(OH)D [ng/ml]_1	Insulin [µIU/ml]_1	Glucose [mg/dl]_1	Glucose [mmol/l]_1	HOMA IR_1	TG [mg/dl] _1	Total Cholesterol[mg/dl]_1	HDL [mg/dl]_1	LDL [mg/dl]_1		Body mass [kg]_2	BMI [kg/m2]_2	Total fat [%]_2	Total fat [g]_2	WBC _2 [109/l]	LYM _2 [109/l]	MON _2 [109/l]	GRA _2 [109/l]	LYM _2 [%]	MON _2 [%]	GRA_2 [%]	25(OH)D ng/ml_2	Insulin [µIU/ml]_2	Glucose [mg/dl]_2	Glucose [mmol/l]_2	HOMA IR_2	TG[mg/dl]_2	Total Cholesterol [mg/dl]_2	HDL [mg/dl]_2	LDL [mg/dl]_2
1	RSA	72	157.5	71.3	28.7	0	44.5	30995	4.9	1.8	0.3	2.8	35.8	6.7	57.5	30.9	17.74	102	5.61	4.42317	87	295	59.2	224		71.8	28.9	43.5	30171	4.7	1.5	0.2	3	31.1	4.1	64.8	29	13.41	106	5.83	3.47468	85	241	48.9	211.8
2	NW	64	162.3	67.2	25.5	0	43	28181	4.9	1.7	0.4	2.9	34.6	7.2	58.2	11.2	5.77	88	4.84	1.24119	146	259	67.1	157.1		70.1	26.6	43.2	28842	3.8	1.5	0.2	2.1	39.6	5.1	55.3	10.9	3.02	94	5.17	0.693929	128	240	63.3	161.5
3	NW	67	170.3	96.5	33.3	1	47.2	44120	5.4	1.4	0.4	3.7	25.6	6.7	67.7	25.3	24.86	90	4.95	5.4692	79	134	38.3	90.1		97.7	33.7	46.8	44515	4.7	1.7	0.2	2.8	36.5	4.3	59.2	22.7	23.2	101	5.555	5.72782	91	123	39	89.5
4	NW	69	165.1	63.2	23.2	0	36.1	22442	6.9	1.9	0.5	4.5	27.9	7.5	64.6	25.6	12.48	83	4.565	2.53205	81	242	64	165.1		63.7	23.4	35.8	21809	5.9	1.8	0.3	3.8	29.7	5.8	64.5	25.3	8.13	88	4.84	1.74885	81	187	57	141.3
5	NW	64	155.8	71	29.2	1	47.7	32553	5.9	2.4	0.4	3.2	40.2	6.4	53.4	32.5	22.72	90	4.95	4.9984	87	204	62.2	129.2		71.6	29.5	44.7	30620	5.2	2	0.3	2.9	38.4	5.7	55.9	29	25.41	92	5.06	5.71443	125	182	57	130.3
6	RSA	71	164.6	66	24.4	0	40.5	26056	6.9	2.4	0.4	4.1	35	5.6	59.4	46.6	10.63	94	5.17	2.44254	81	191	69	107.5		67.4	24.9	39.9	25858	6.3	2.6	0.3	3.4	41	5.4	53.6	42.8	5.84	89	4.895	1.27052	65	164	64.7	107.3
7	RSA	68	165.4	77.6	28.4	0	40.1	30368	6.8	2	0.5	4.3	29.7	7	63.3	27.2	22.68	92	5.06	5.10048	112	189	49.6	125		79.1	28.9	38.1	29141	6.5	1.8	0.2	4.4	27.8	3.8	68.4	38.9	20.53	94	5.17	4.71734	108	168	50.9	126.6
8	NW	64	160.4	67.2	26.1	0	42.9	27916	4.8	2	0.4	2.5	40.8	8	51.2	29.1	3.03	89	4.895	0.659193	35	226	63.2	144.3		66.4	25.8	41	26078	5.3	2	0.4	2.9	38.2	7.2	54.6	37	3.9	103	5.665	0.981933	53	221	70	154.2
9	NW	62	157.7	77.8	31.3	1	43.7	32916	6.3	2.2	0.5	3.5	35.5	8.6	55.9	15	16.44	97	5.335	3.89811	333	201	42.7	125.6		77	31	41.5	30776	4.8	1.5	0.2	3	32.1	5.2	62.7	14.2	17.11	103	5.665	4.30792	283	220	42.7	178.6
10	RSA	73	161.5	67.5	25.9	0	37	24157	8	2.2	0.6	5.2	27.5	7.8	64.7	10.1	15.13	88	4.84	3.25463	130	194	66.9	80.9		66.6	25.5	36.1	23207	7	1.8	0.3	4.9	25.5	4.1	70.4	11.2	8.12	90	4.95	1.7864	123	169	58.6	87.4
11	NW	61	165.5	63.8	23.3	0	37.4	22740	9.5	3.7	0.8	5	38.9	8.2	52.9	14.4	7.53	101	5.555	1.85907	64	190	71.9	99.7		63.8	23.3	35.9	21696	9.4	2.5	0.4	6.5	26.2	4.5	69.3	12.5	6.27	100	5.5	1.53267	74	172	68.1	107.2
12	RSA	67	157.9	55.6	22.3	0	32.7	17588	4.9	2.4	0.4	2.1	48.8	8.4	42.8	43.7	17.84	83	4.565	3.61954	52	231	77.5	137.1		55.2	22.1	31.2	16488	4.1	1.6	0.2	2.3	39	5.9	55.1	46.5	7.71	83	4.565	1.56427	51	175	69.5	109.8
13	NW	60	167.9	74.8	26.5	0	46	31617	7.3	2	0.6	4.7	28	8.2	63.8	41.5	25.42	112	6.16	6.95943	113	167	56.8	93.1		76.2	27	46.1	33311	5.4	1.8	0.3	3.3	32.5	5.6	61.9	44.8	18.63	113	6.215	5.14602	98	166	63.8	103.9
14	RSA	69	164.7	62.7	23.1	0	34.4	21348	6.3	2.6	0.6	3.1	41.5	9.6	48.9	51.2	7.02	84	4.62	1.44144	82	204	61	128.7		62.7	23.6	33.3	20090	5.9	2.4	0.3	3.1	41.2	5.9	52.9	37.9	8.64	86	4.73	1.81632	72	182	59.4	132
15	NW	68	160.8	64.5	24.9	0	37.6	23757	7.2	3.2	0.5	3.4	44.8	7.3	47.9	15.5	8.24	102	5.61	2.05451	121	252	66.3	210.1		65.5	25.3	37.9	23809	5.9	2.4	0.3	3.2	40.3	5.7	54	23.4	13.03	109	5.995	3.47177	93	256	67.5	207
16	NW	64	173.5	61.3	20.4	0	32.3	19085	5.9	1.7	0.4	3.9	28	6.3	65.7	31.8	17.18	96	5.28	4.03157	69	191	74.9	128.8		62.8	20.9	32.5	19385	5.1	1.7	0.4	3.1	32.4	7.4	60.2	29.7	13.9	95	5.225	3.22789	71	185	71	121.8
17	RSA	64	159.3	79.3	31.2	1	48.2	37475	4.5	1.8	0.3	2.4	40.6	5.7	53.7	19.7	19.54	79	4.345	3.77339	101	219	96.8	127.5		77.3	30.5	46.6	34708	3.5	1.8	0.2	1.5	51.4	6	42.6	22.8	9.21	79	4.345	1.77855	54	213	84.3	136.2
18	RSA	65	158.3	77.6	31	1	40.3	30531	5.3	2.2	0.3	2.8	42.3	5.5	52.2	24.1	18.01	122	6.71	5.37098	160	240	53.7	191.4		78.5	31.3	40.8	30766	6	2.3	0.3	3.4	38.1	5.7	56.2	28.8	19.81	116	6.38	5.61724	116	267	58.6	219.9
19	NW	68	154.1	59.2	24.9	0	43.6	24896	4.4	1.6	0.3	2.5	36.4	6.3	57.3	25.9	9.5	95	5.225	2.20611	95	254	64.1	203.8		59.2	24.9	42.7	24139	4.4	1.4	0.2	2.8	31.3	4.8	63.9	25	13.01	100	5.5	3.18022	82	282	84	213.8
20	NW	69	153.8	52	22	0	40.3	20380	6.9	1.4	0.4	5.1	20.6	5.2	74.2	16.1	12.03	90	4.95	2.6466	125	166	72.7	98.1		53.5	22.6	41.5	21116	4.6	1.2	0.3	3.1	26.6	5.8	67.6	14.5	7.69	82	4.51	1.54142	78	165	72.1	98.1
21	NW	63	156.8	62.4	25.4	0	43	26585	7.4	2.4	0.4	4.6	32.1	5.4	62.5	20.1	13.73	107	5.885	3.59116	60	182	51.2	148.3		64.3	26.2	42	25827	6.2	2.4	0.3	3.6	38.1	4.1	57.8	17.8	6.19	97	5.335	1.46772	59	133	55.5	81.6
22	NW	72	157.6	68.9	27.7	0	36.9	25157	8.9	2	0.6	6.3	22.4	7.2	70.4	34.4	22.63	98	5.39	5.42114	60	179	73.7	116.6		70.4	28.3	38.4	26413	5.7	1.9	0.3	3.5	34	4.5	61.5	35.4	10.18	100	5.5	2.48844	54	167	75.3	95.9
23	NW	64	155	58.6	24.4	0	38.8	22646	6.8	1.3	0.4	5.1	19.8	5.8	74.4	29.3	21.31	95	5.225	4.94866	50	215	62.5	171.2		59.2	24.6	40.1	22840	4.2	1.4	0.2	2.6	33.1	5.2	61.7	27.3	16	86	4.73	3.36356	55	223	60.3	178.4
